# Supplementary material
Source: publisher figshare collection journal article supplement (https://tandf.figshare.com/ndownloader/files/21269499)
Supplement: Supplementary file 1 [file 21269499]

**Supplementary Material**


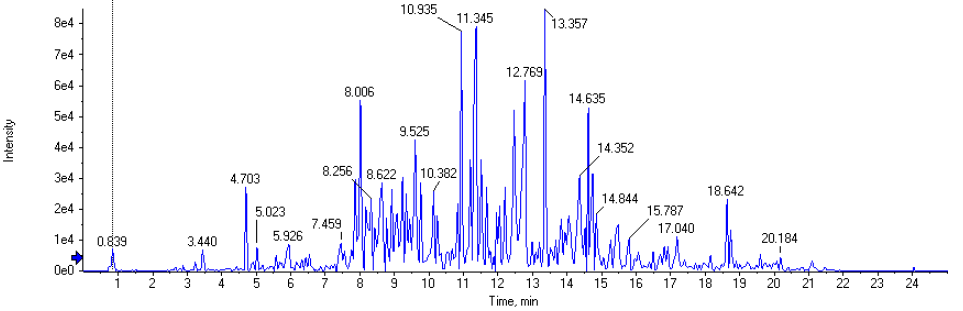


**Fig S1. TIC chromatogram of the ethyl acetate fraction of *C. mangga***

p-Hydroxycinnamic acid [M-H]- 163.089 at RT 0.8**39** min

**
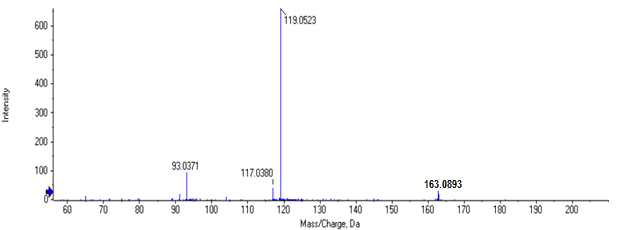
**

Copallic acid [M-H]- 303.1913 at RT 2.81min

**
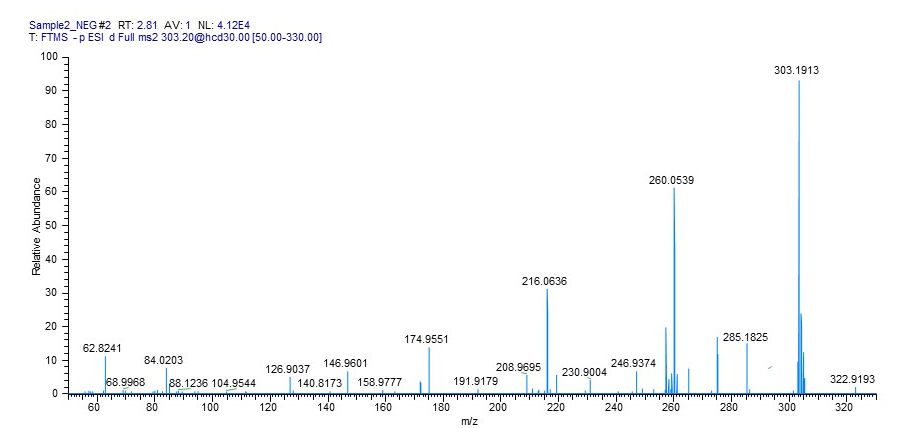
**

Demethoxycurcumin [M-H]- 337.1090 at RT 5.52 min

**
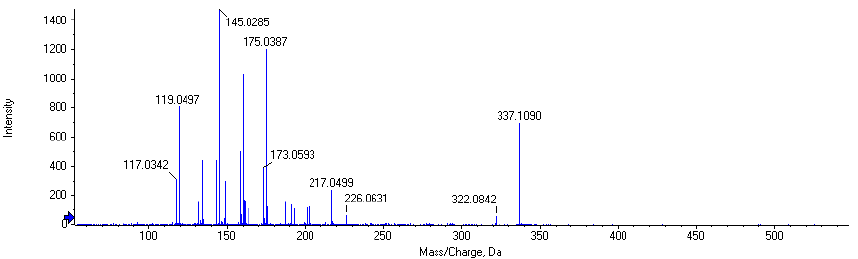
**

Curcumin [M-H]- 367.2129 at RT 5.92 min


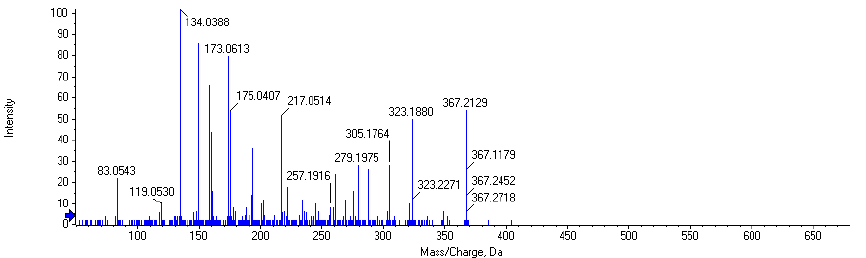


Calcaratarin A [M-H]- 347.1495 at RT 7.45 min

**
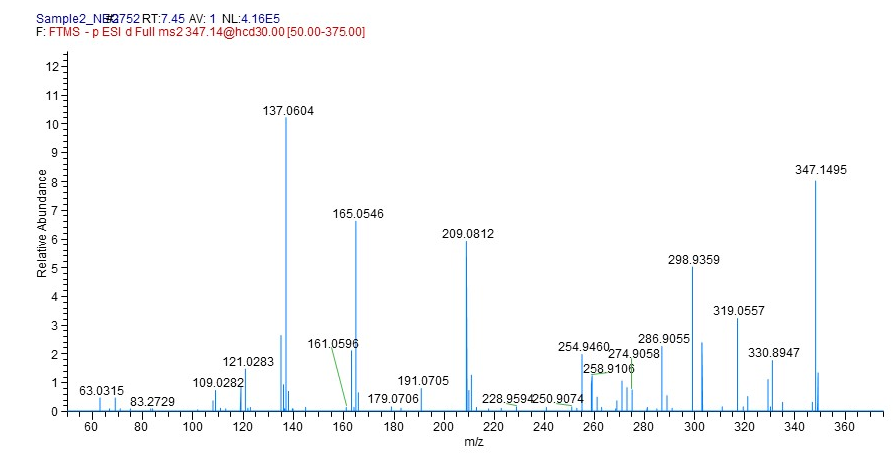
**

Epigallocatechin 305.2139 at RT 8.33 min


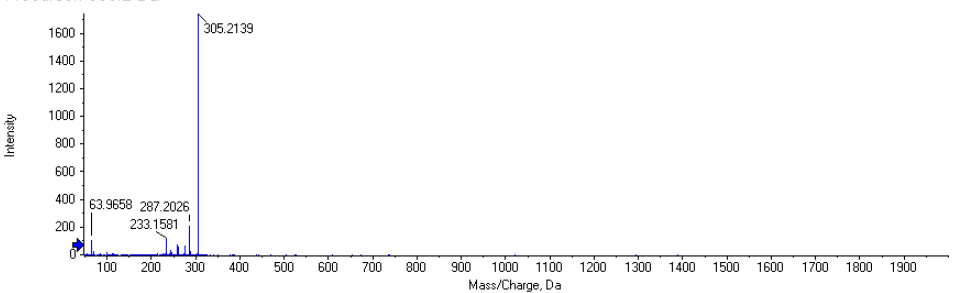


Zerumin A [M-H]- 317.2159 at RT 8.94 min

**
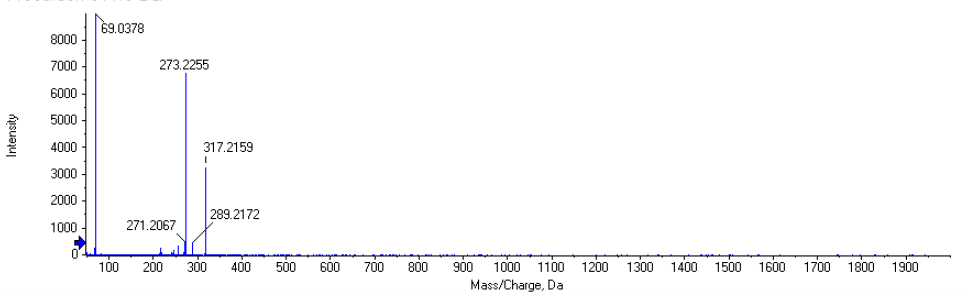
**

Zerumin B [M-H]- 333.2083 at RT 9.95 min

**
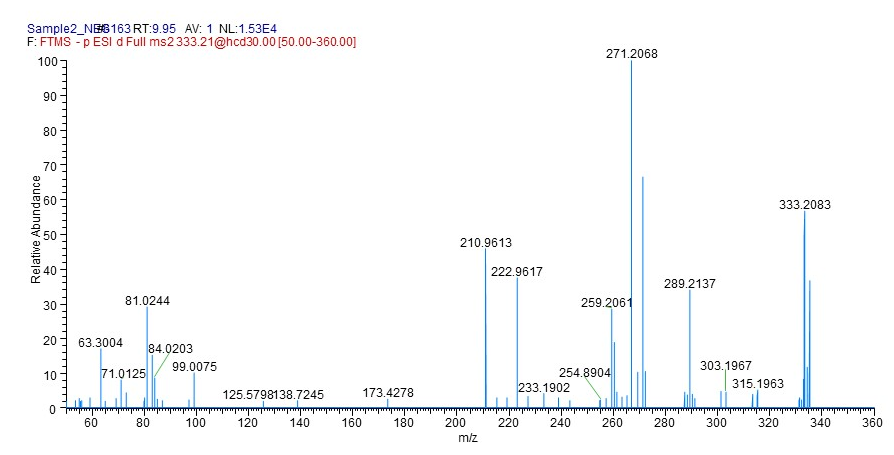
**

1,7-Bis(4-hydroxyphenyl)-1,4,6-heptatrien-3-one [M-H]- 291.1213 at RT 10.93 min

**
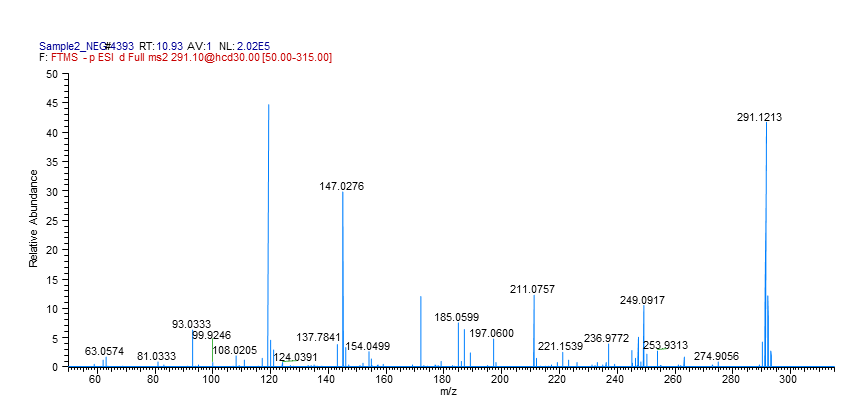
**

Curcumanggoside [M-H]- 511.3420 at RT 11.81 min **
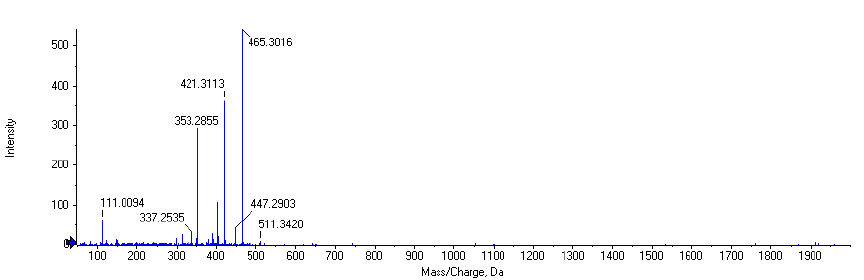
**

Labda-8(17),12-diene-15,16-dial [M-H]- 301.2035 at RT 18.64 min

**
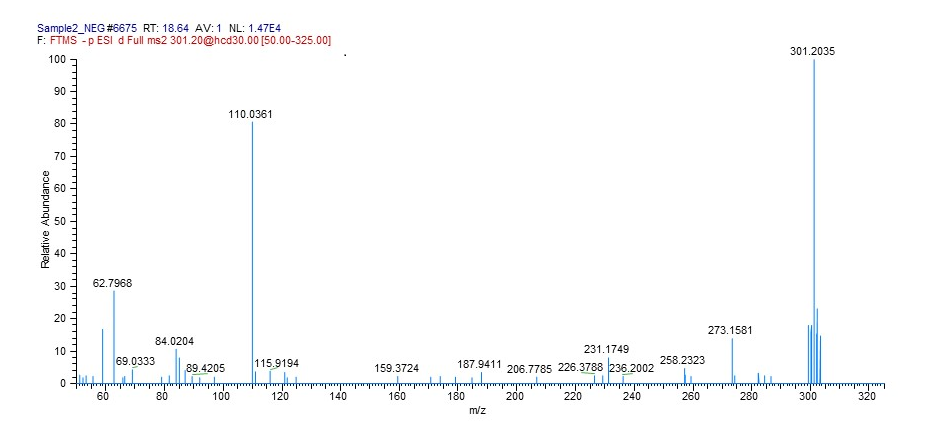
**

**Fig S2. Mass spectra of compounds identified from the ethyl acetate fraction of *C. mangga***
